# Supplementary material
Source: PubMed Central journal article supplement (PMC4939089)
Supplement: NIHMS788691-supplement-supplemental.pdf [file NIHMS788691-supplement-supplemental.pdf]

## Supplementary Online Content

Neuenschwander AG, Thai KK, Figueroa KP, Pulst SM. Amyotrophic lateral sclerosis risk for spinocerebellar ataxia type 2 *ATXN2* CAG repeat alleles. *JAMA Neurol*. Published online October 6, 2014. doi:10.1001/jamaneurol.2014.2082.

**eTable.** *ATXN2* Repeat Lengths for Control Populations and ALS Cases in 9 Studies

This supplementary material has been provided by the authors to give readers additional information about their work.

**eTable.** *ATXN2* Repeat Lengths for Control Populations and ALS Cases in 9 Studies

| Repeat Length | Elden (2010) |      | Corrado (2011) |     | Daoud (2011) |      | Gispert (2011) |      | Van Damme (2011) |      | Gellera (2012) |      | Lahut (2012) |     | Van Langenhove (2012) |     | Liu (2013) |      |
|---------------|--------------|------|----------------|-----|--------------|------|----------------|------|------------------|------|----------------|------|--------------|-----|-----------------------|-----|------------|------|
|               | Control      | ALS  | Control        | ALS | Control      | ALS  | Control        | ALS  | Control          | ALS  | Control        | ALS  | Control      | ALS | Control               | ALS | Control    | ALS  |
| ≤23           | 1936         | 1777 | 771            | 636 | 918          | 1064 | 2671           | 1093 | 3802             | 3524 | 1076           | 1280 | 834          | 305 | 1593                  | 135 | 987        | 2075 |
| 24            | 4            | 6    | 3              | 1   | 3            | 8    | 9              | 1    | 26               | 20   | 4              | 3    | 4            | 1   | 1                     | 2   | 0          | 11   |
| 25            | 4            | 1    | 0              | 0   | 2            | 1    | 1              | 1    | 4                | 6    | 1              | 1    | 1            | 0   | 0                     | 0   | 11         | 12   |
| 26            | 2            | 0    | 0              | 0   | 0            | 0    | 0              | 0    | 0                | 0    | 1              | 0    | 0            | 0   | 1                     | 0   | 1          | 4    |
| 27            | 11           | 22   | 7              | 1   | 15           | 13   | 48             | 15   | 136              | 84   | 11             | 10   | 3            | 1   | 20                    | 3   | 2          | 4    |
| 28            | 0            | 1    | 1              | 0   | 0            | 1    | 1              | 0    | 4                | 0    | 2              | 0    | 1            | 0   | 0                     | 0   | 4          | 2    |
| 29            | 1            | 2    | 5              | 1   | 1            | 6    | 5              | 1    | 18               | 18   | 5              | 4    | 1            | 0   | 3                     | 1   | 0          | 6    |
| 30            | 0            | 4    | 1              | 0   | 1            | 3    | 1              | 3    | 6                | 10   | 1              | 3    | 0            | 0   | 1                     | 2   | 7          | 3    |
| 31            | 2            | 7    | 0              | 3   | 1            | 5    | 1              | 0    | 8                | 8    | 1              | 7    | 0            | 1   | 1                     | 0   | 0          | 6    |
| 32            | 0            | 8    | 0              | 3   | 1            | 6    | 0              | 3    | 0                | 10   | 0              | 6    | 0            | 2   | 0                     | 0   | 0          | 5    |
| 33            | 0            | 2    | 0              | 2   | 0            | 1    | 0              | 0    | 0                | 4    | 0              | 2    | 0            | 0   | 0                     | 1   | 0          | 3    |
| 34            | 0            | 0    | 0              | 0   | 0            | 0    | 1              | 0    | 0                | 2    | 0              | 0    | 0            | 0   | 0                     | 0   | 0          | 2    |
| 35            | 0            | 0    | 0              | 0   | 0            | 2    | 0              | 1    | 0                | 0    | 0              | 0    | 0            | 0   | 0                     | 0   | 0          | 1    |
| 36            | 0            | 0    | 0              | 0   | 0            | 1    | 0              | 0    | 0                | 2    | 0              | 0    | 0            | 0   | 0                     | 0   | 0          | 0    |
| 37            | 0            | 0    | 0              | 1   | 0            | 1    | 0              | 0    | 0                | 0    | 0              | 0    | 0            | 0   | 0                     | 0   | 0          | 0    |
| 38            | 0            | 0    | 0              | 0   | 0            | 0    | 0              | 0    | 0                | 0    | 0              | 0    | 0            | 0   | 0                     | 0   | 0          | 0    |
| 39            | 0            | 0    | 0              | 0   | 0            | 0    | 0              | 0    | 0                | 2    | 0              | 0    | 0            | 0   | 0                     | 0   | 0          | 0    |
| Total         | 1960         | 1830 | 788            | 648 | 942          | 1112 | 2738           | 1118 | 4004             | 3690 | 1102           | 1316 | 844          | 310 | 1620                  | 144 | 1012       | 2134 |
